# Supplementary material for: Shikonin Derivatives Inhibit Inflammation Processes and Modulate MAPK Signaling in Human Healthy and Osteoarthritis Chondrocytes
Source: MDPI journal article supplement (doi:10.3390/ijms23063396), 2022-03-21

Figure 3A

original

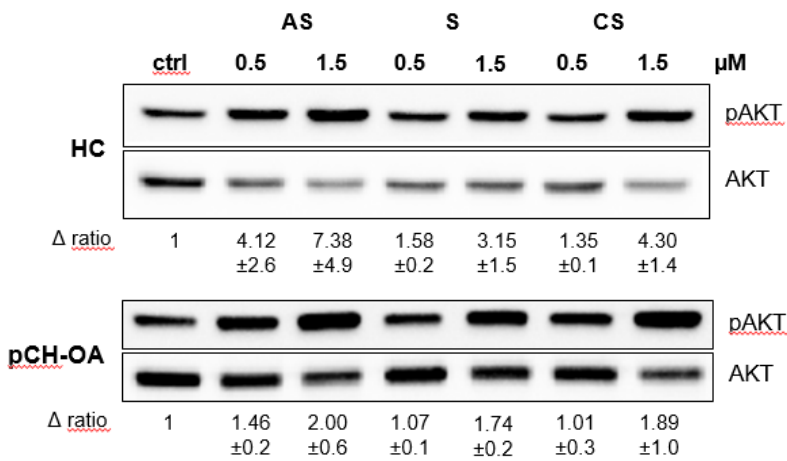

uncropped blots

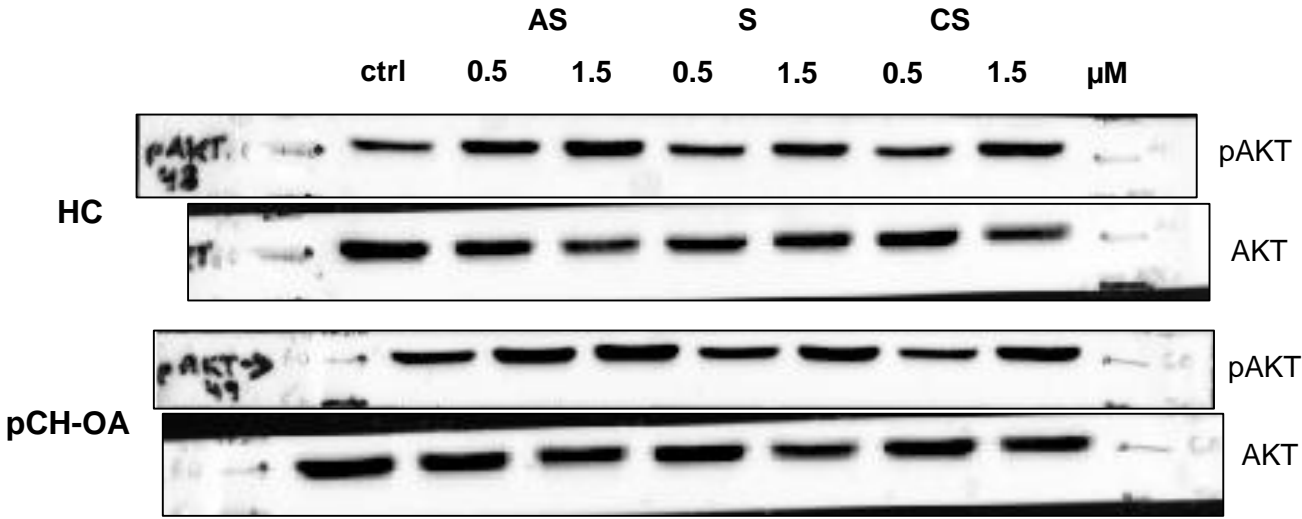

Figure 4A

original

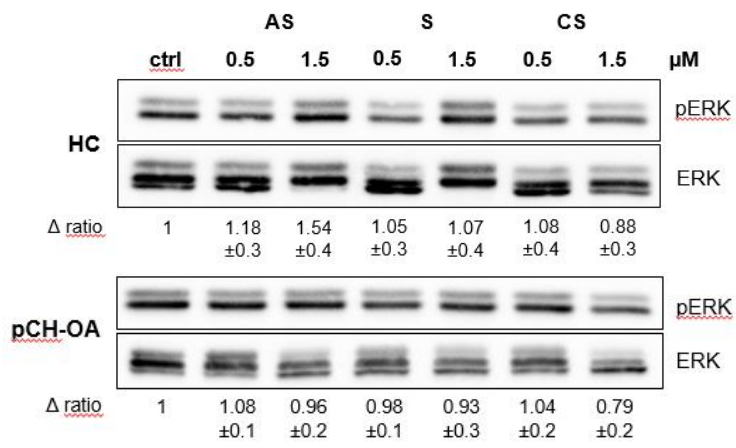

uncropped blots

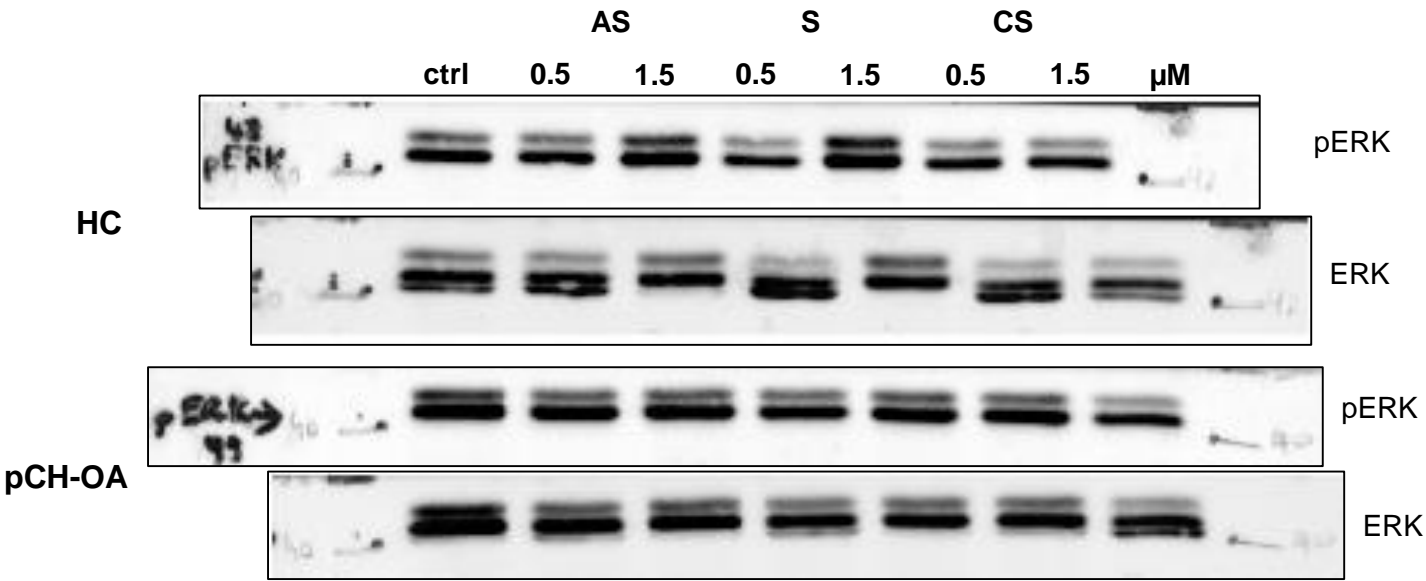

Figure 4A

original

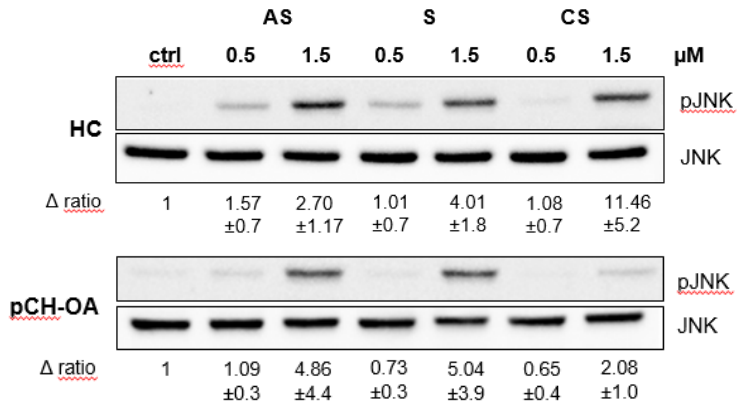

uncropped blots

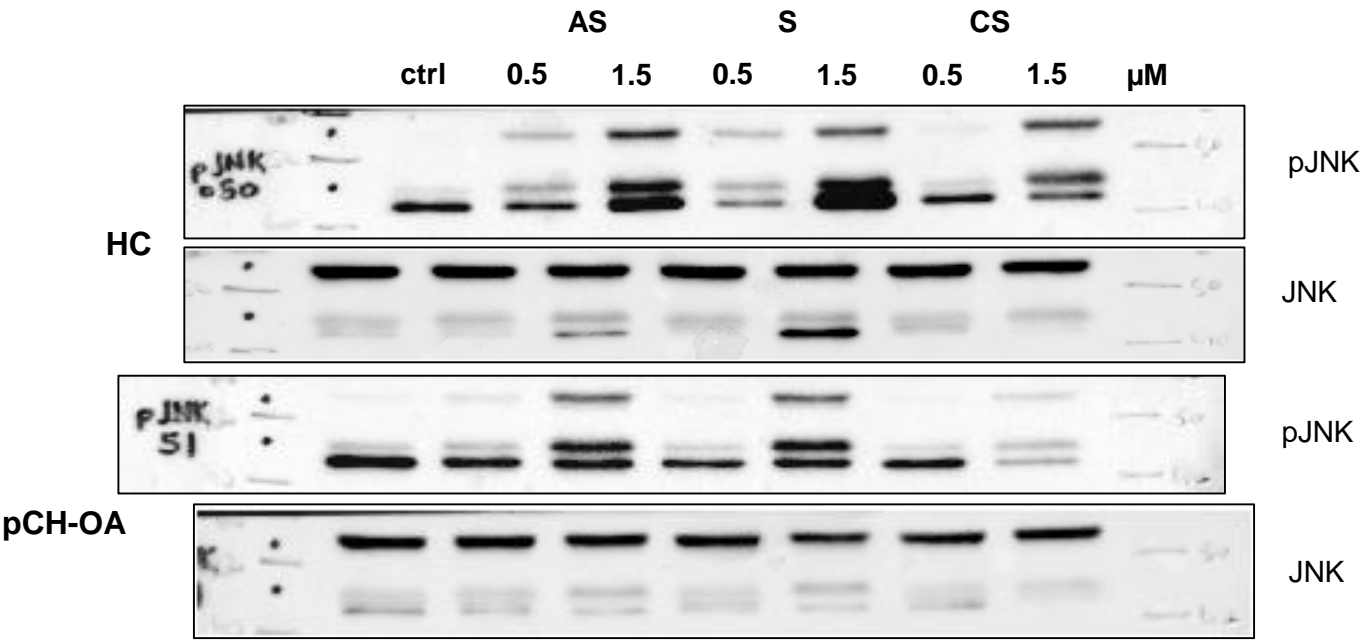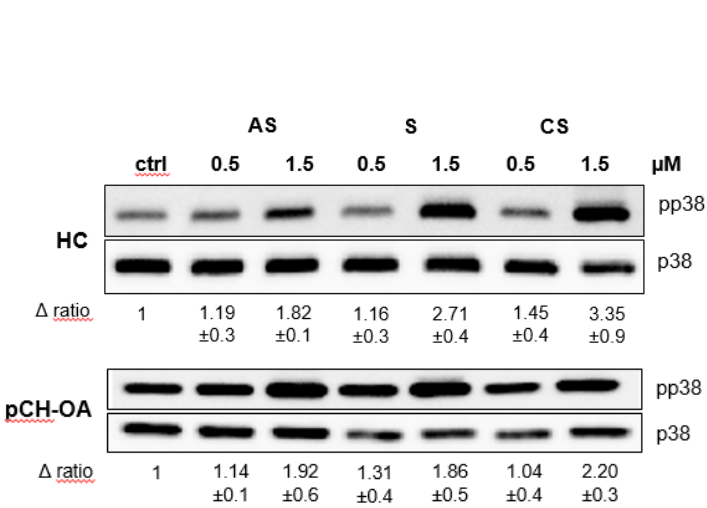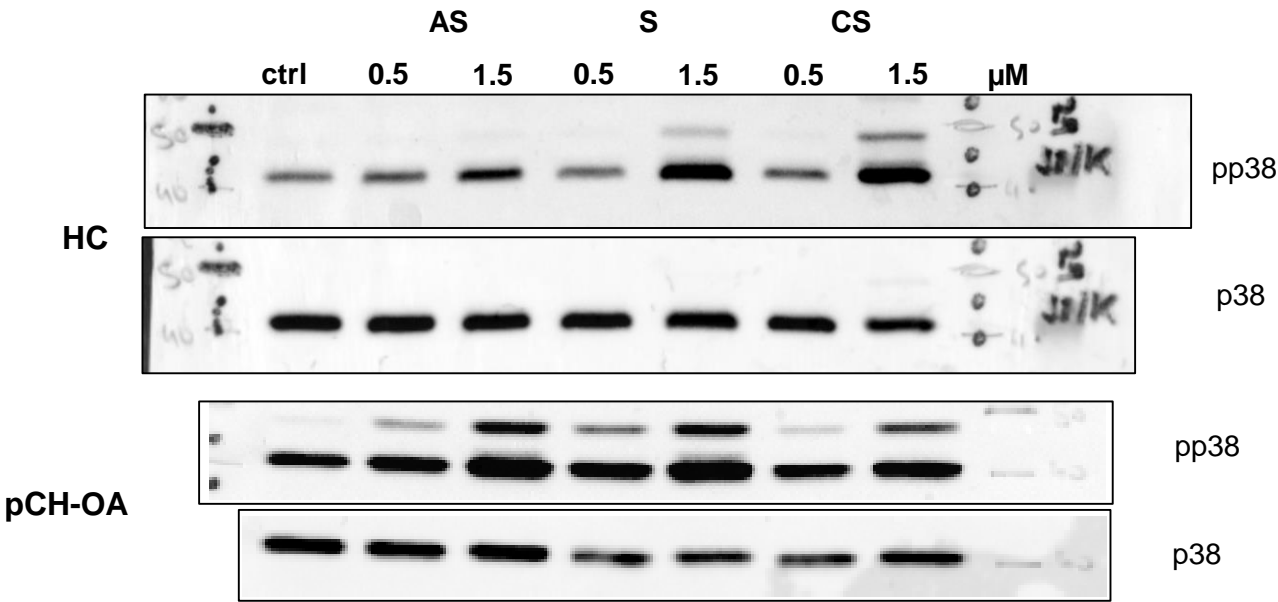

### Figure 5A

**original**

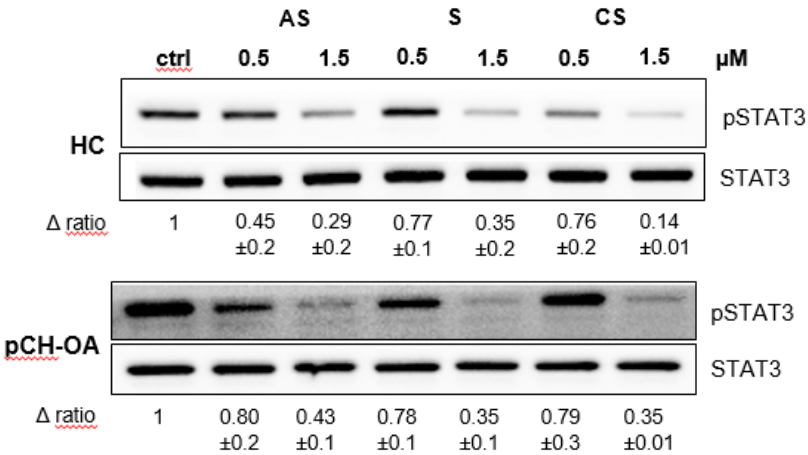

## uncropped blots

AS

**S**

CS

**ctrl**

# 0.5

## 1.5

0.5

## 1.5

0.5

1.5

**μM**

HC

**pCH-OA**

pSTAT3

STAT3

pSTAT3

STAT3

Figure 6A

original

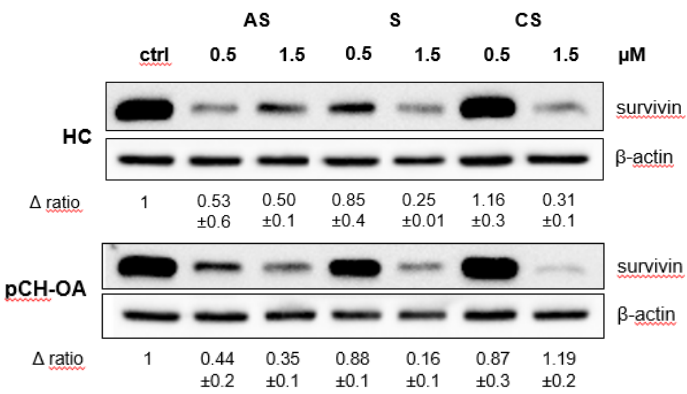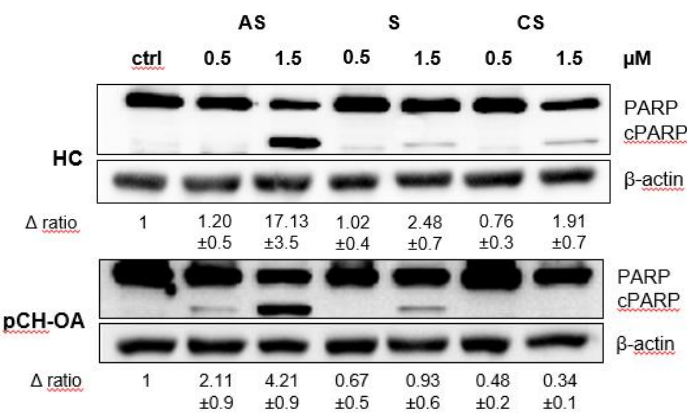

uncropped blots

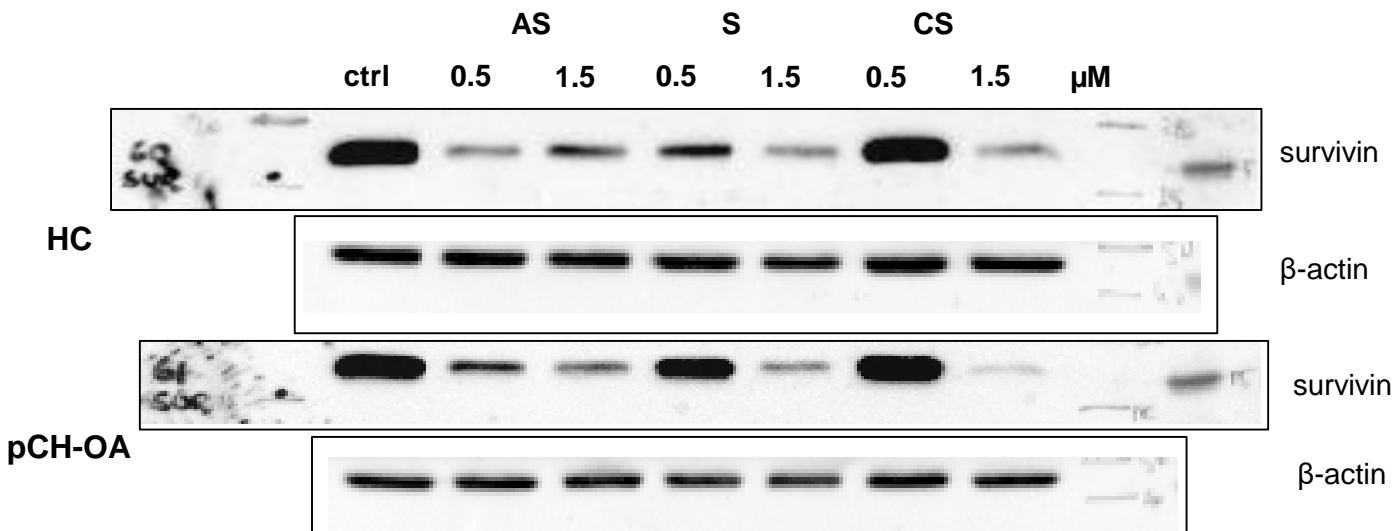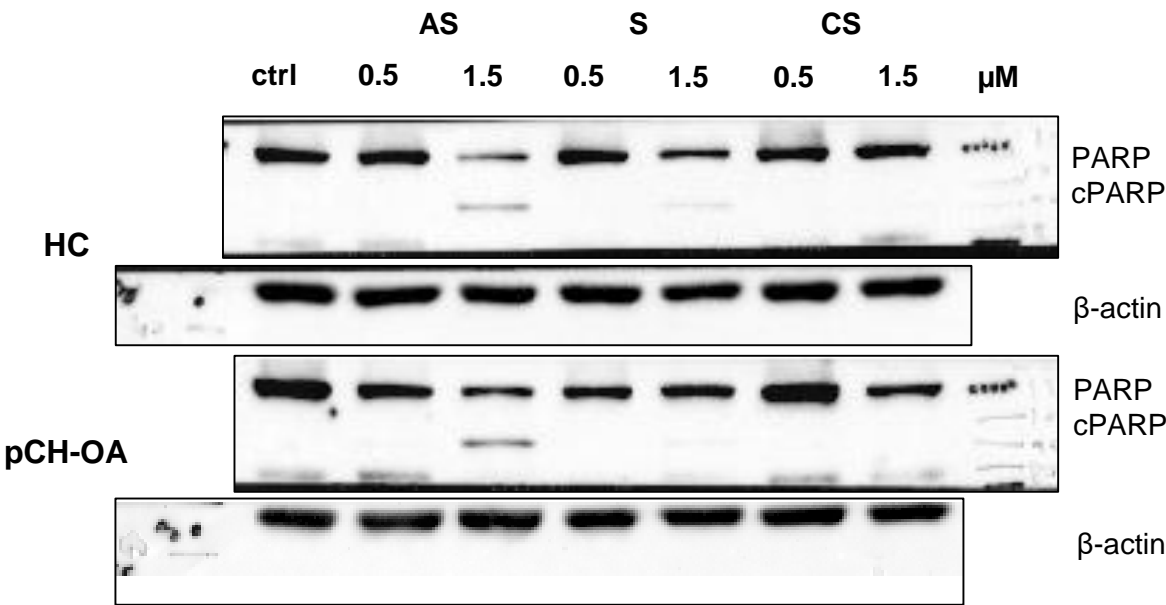

Figure 6A

original

uncropped blots

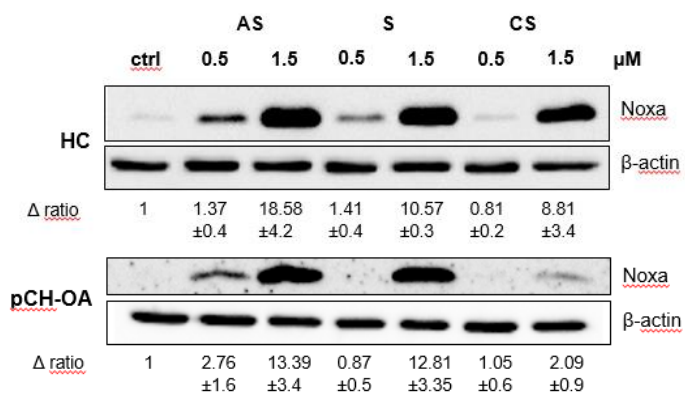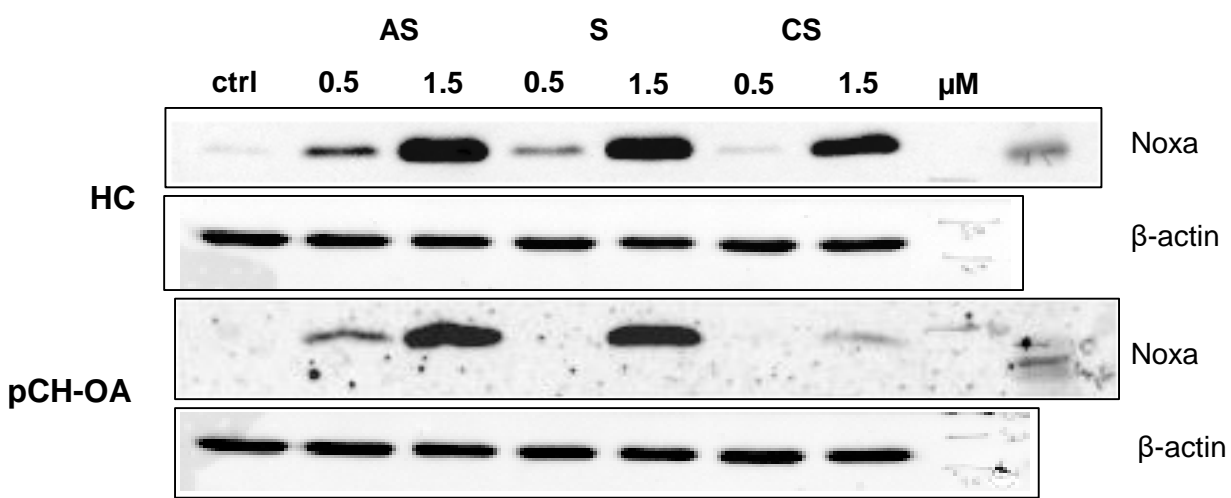

Supplement: s1 [file s1]
